# Supplementary material
Source: PubMed Central journal article supplement (PMC5339057)
Supplement: NIHMS845005-supplement-Supp_Fig_S1.pdf [file NIHMS845005-supplement-Supp_Fig_S1.pdf]

## Early Involvement of Lysosome Dysfunction in the Degeneration of Cerebral Cortical Neurons Caused by the Lipid Peroxidation Product 4-Hydroxynonenal

Shi Zhang<sup>1</sup>, Erez Eitan<sup>1</sup> and Mark P. Mattson<sup>1, 2, \*</sup>

<sup>1</sup>Laboratory of Neurosciences, National Institute on Aging Intramural Research Program, BRC 5C214, 251 Bayview Boulevard, Baltimore, MD 21224, USA.

<sup>2</sup>Department of Neuroscience, Johns Hopkins University School of Medicine, Baltimore, MD, 21205, USA.

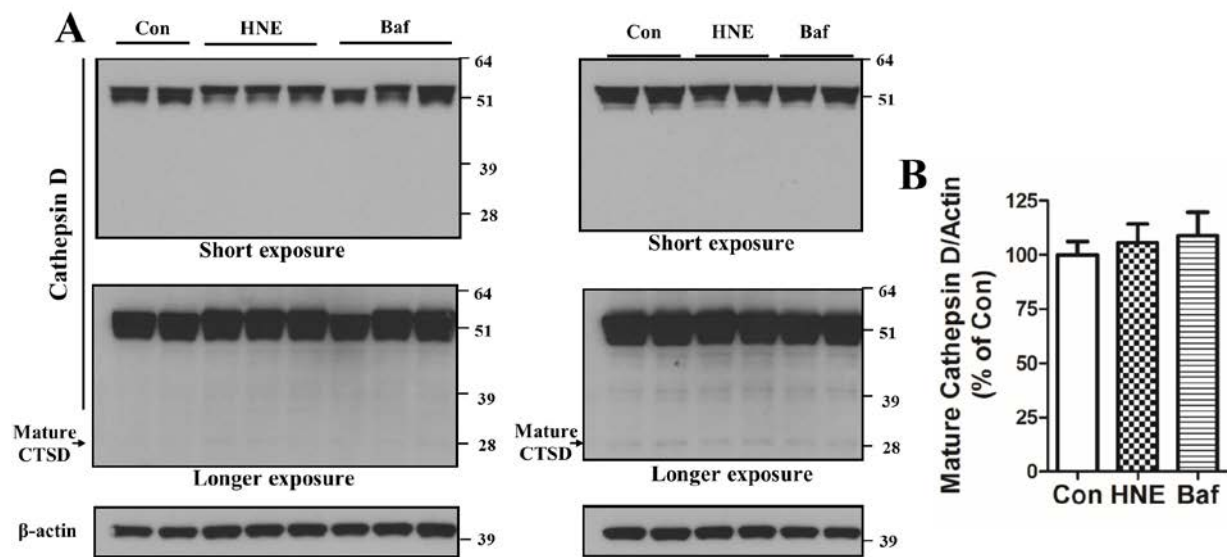

### Supplemental Figure 1

(A) Cortical neurons were treated for 6 hours with 0.5% ethanol (control), 5  $\mu$ M HNE or 100 nM bafilomycin. Proteins in cell lysates were subjected to immunoblot analysis using a cathepsin D antibody. (A) Representative images of immunoblots of cathepsin D with short and long exposure times are shown. Arrows point to mature cathepsin D at the molecular weight of 28 kDa. (B) Results of densitometric analysis of blots showing relative levels of mature cathepsin D in neurons treated for 6 hours with 0.5% ethanol (control), 5  $\mu$ M HNE or 100 nM bafilomycin. There were no significant differences among these groups.
